# Supplementary material
Source: PubMed Central journal article supplement (PMC7186907)
Supplement: NIHMS1569009-supplement-1.pdf [file NIHMS1569009-supplement-1.pdf]

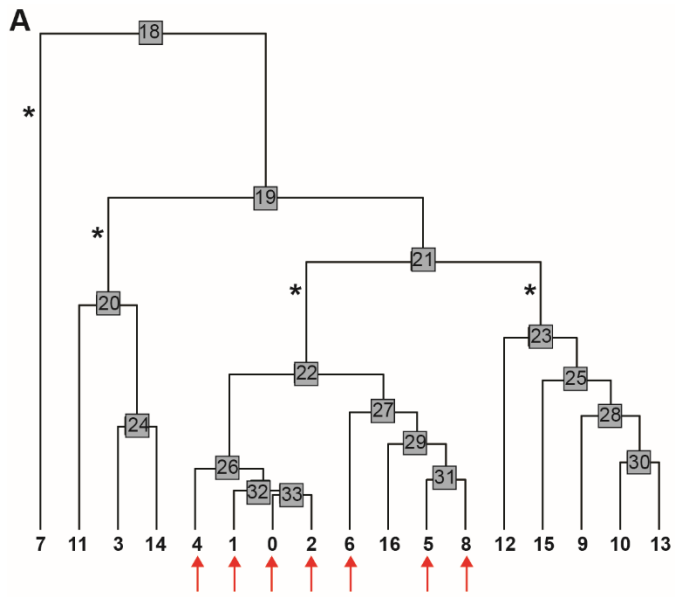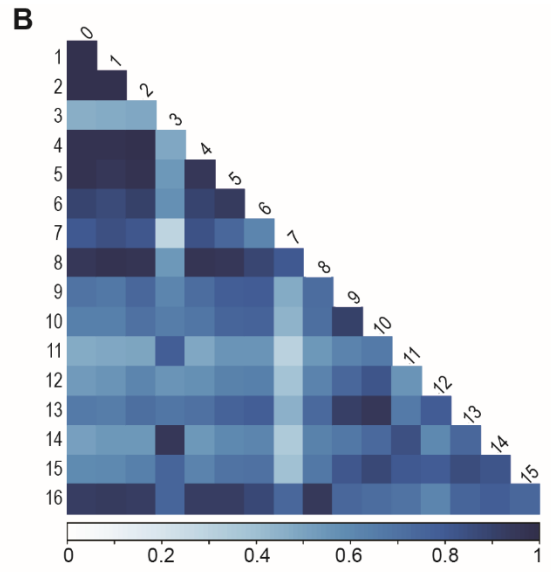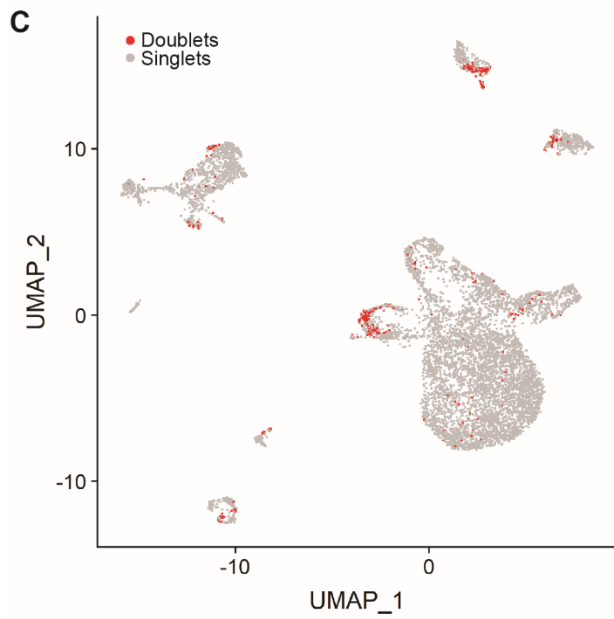

## Figure S1

### 11dpa cluster relationships and doublet detection (Relates to Figures 1 and 2)

(A) Dendrogram showing the relationships between clusters; cell cluster numbers correlate with cluster numbers shown on UMAP plot in Figure 1B. Asterisks denote four main branches of the dendrogram, and red arrows denote fibroblast clusters. (B) Heatmap showing the Pearson correlation between each cell cluster, where dark blue represents highly correlated ( $r$  nears 1) and light blue represents lowly correlated ( $r$  nears 0). (C) 419 cells classified as doublets were excluded from all subsequent analyses and are shown in red; all singlet cells are in gray.

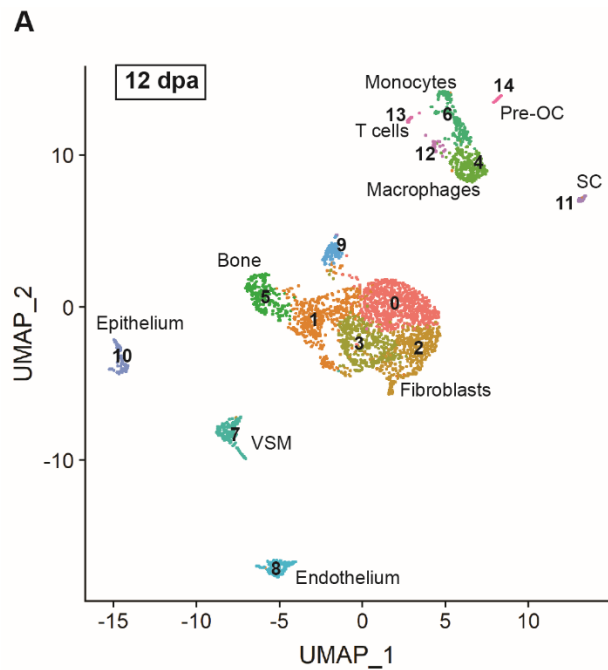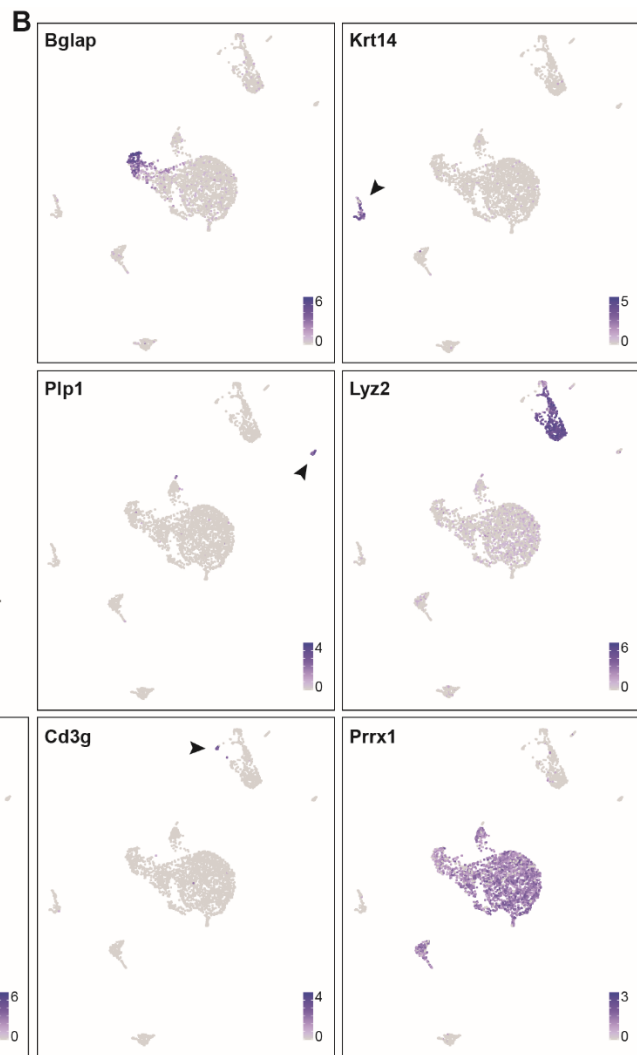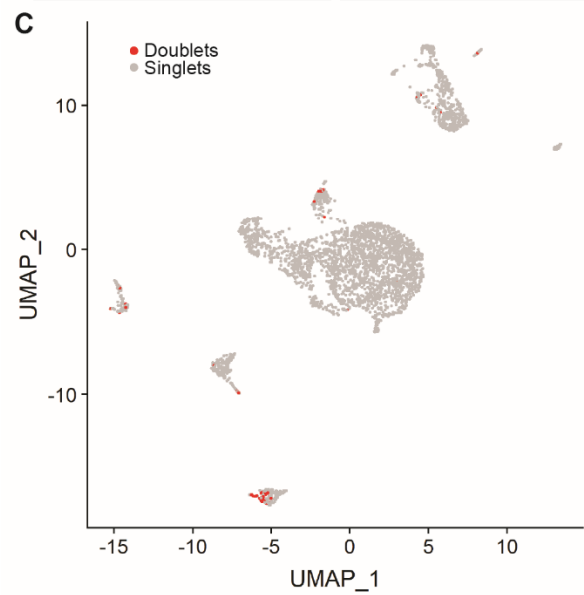

## Figure S2

### Single cell RNAseq of 12dpa blastema (Relates to Figure 3 and Table S1)

(A) Unbiased single cell clustering of 3,309 high quality cells visualized by UMAP. Each dot represents a single cell and cells assigned to the same cluster are similarly colored. Cell type identities are assigned as follows: fibroblasts (clusters 0-3, and 9), macrophages (clusters 4 and 12), bone (cluster 5), monocytes (cluster 6), vascular smooth muscle cells (VSM) (cluster 7), endothelial cells (cluster 8), epithelial cells (cluster 10), Schwann cells (SC) (cluster 11), T cells (cluster 13), and pre-osteoclasts (Pre-OC) (cluster 14). (B) Gene expression UMAP overlay with examples of highly expressed, cell type specific markers used to assign cluster cell identities: *Bglap* (bone), *Krt14* (epithelial cells), *Plp1* (SCs), *Lyz2* (monocytes/macrophages), *Pecam1* (endothelial cells), *Rgs5* (vascular smooth muscle cells), *Cd3g* (T cells), *Prrx1* (fibroblasts). Gray depicts low expression and purple depicts high expression as specified on the scale for each gene. Black arrowheads denote the population of cells expressing a particular marker. (C) 83 cells were classified as doublets (red) and excluded from all subsequent analyses.

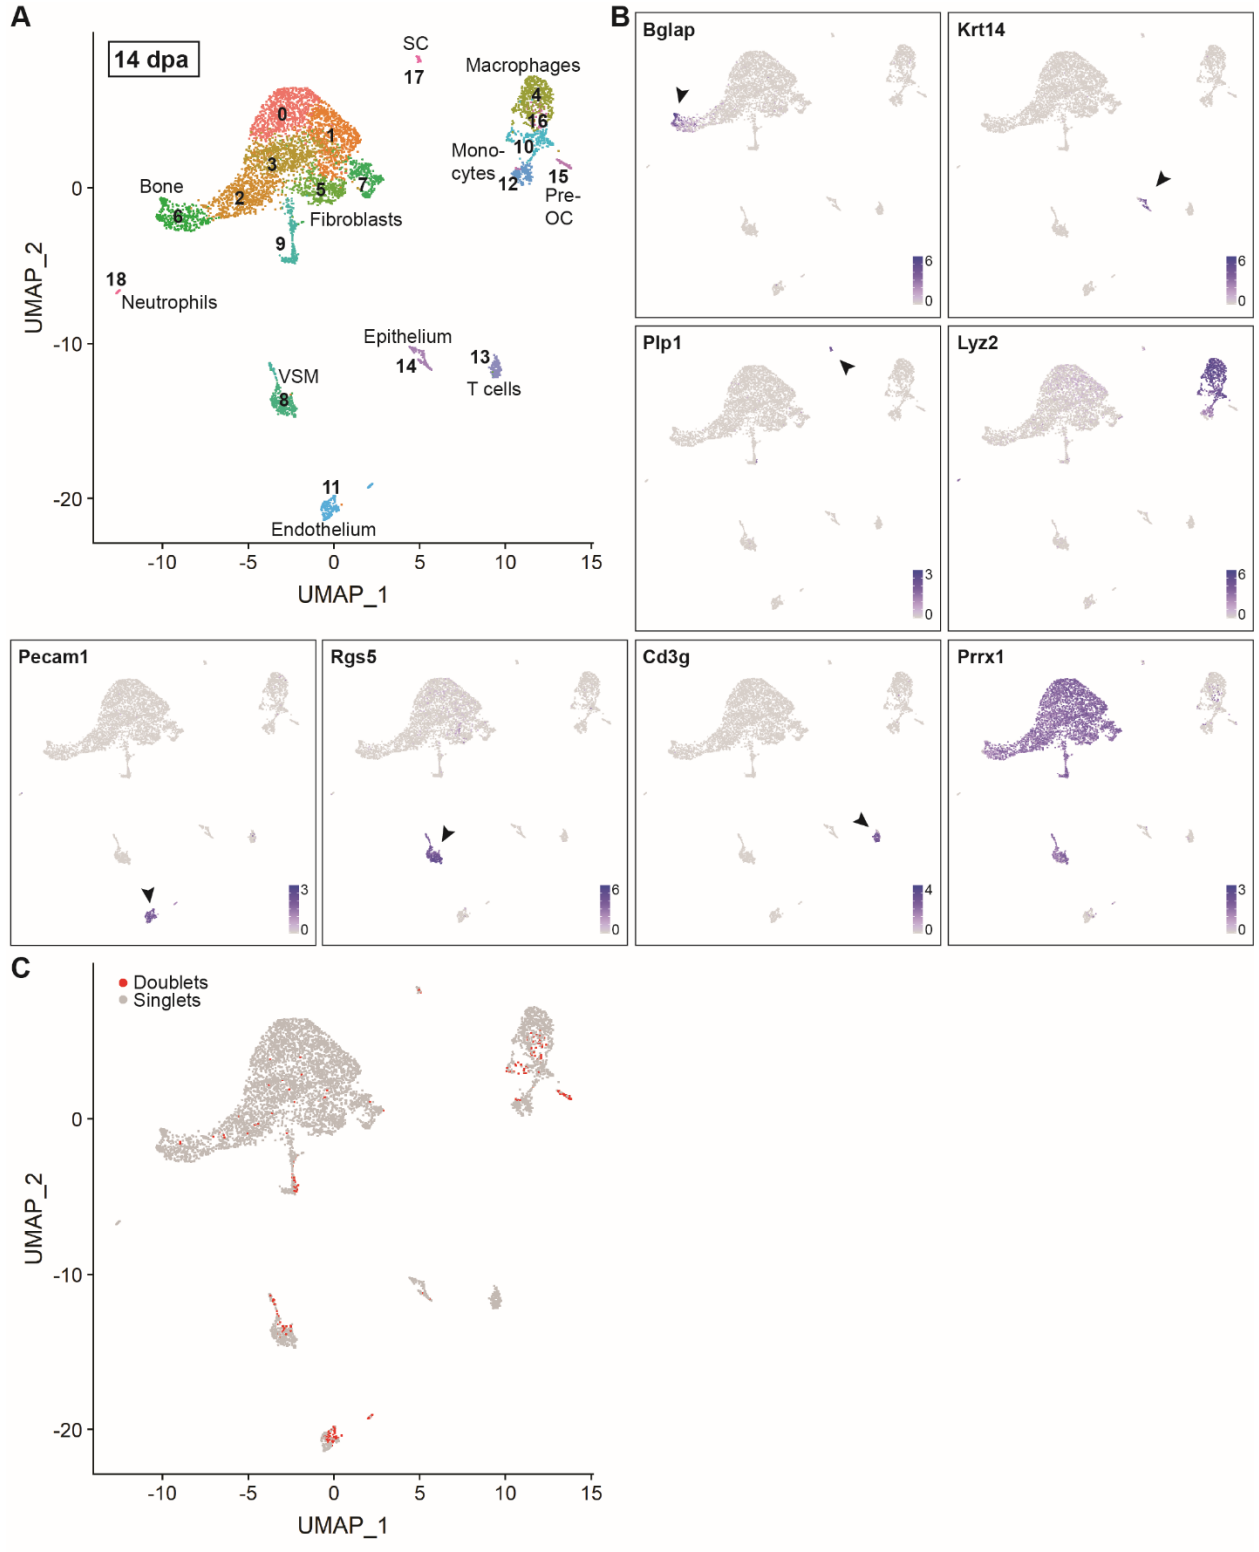

## Figure S3

### Single cell RNAseq of 14dpa blastema (Relates to Figure 3 and Table S1)

(A) Unbiased single cell clustering of 5,896 high quality cells visualized by UMAP. Each dot represents a single cell and cells assigned to the same cluster are similarly colored. Cell type identities are assigned as follows: fibroblasts (clusters 0-3, 5, 7, and 9), macrophages (clusters 4 and 16), bone (cluster 6), vascular smooth muscle cells (VSM) (cluster 8), monocytes (clusters 10 and 12), endothelial cells (cluster 11), T cells (cluster 13), epithelial cells (cluster 14), pre-osteoclast (Pre-OC) (cluster 15), Schwann cells (SC) (cluster 17), neutrophils (cluster 18). (B) Gene expression UMAP overlay with examples of highly expressed, cell type specific markers used to assign cluster cell identities: *Bglap* (bone), *Krt14* (epithelial cells), *Plp1* (SCs), *Lyz2* (monocytes/macrophages), *Pecam1* (endothelial cells), *Rgs5* (vascular smooth muscle cells), *Cd3g* (T cells), *Prrx1* (fibroblasts). Gray depicts low expression and purple depicts high expression as specified on the scale for each gene. Black arrowheads denote the population of cells expressing a particular marker. (C) 271 cells were classified as doublets (red) and excluded from all subsequent analyses.

**A**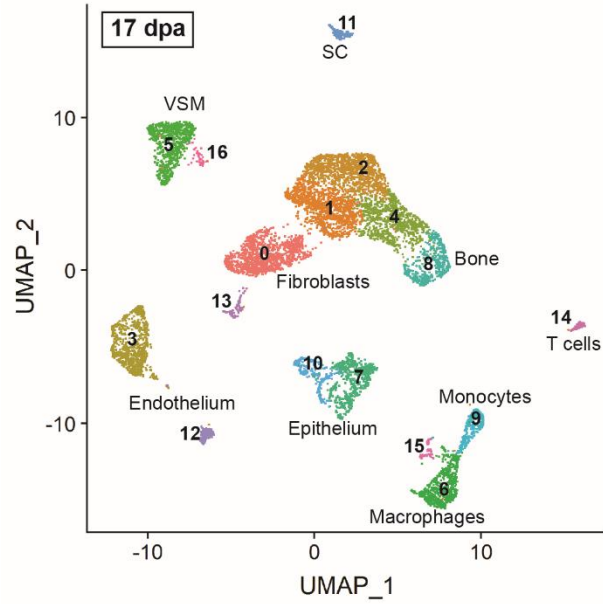**B**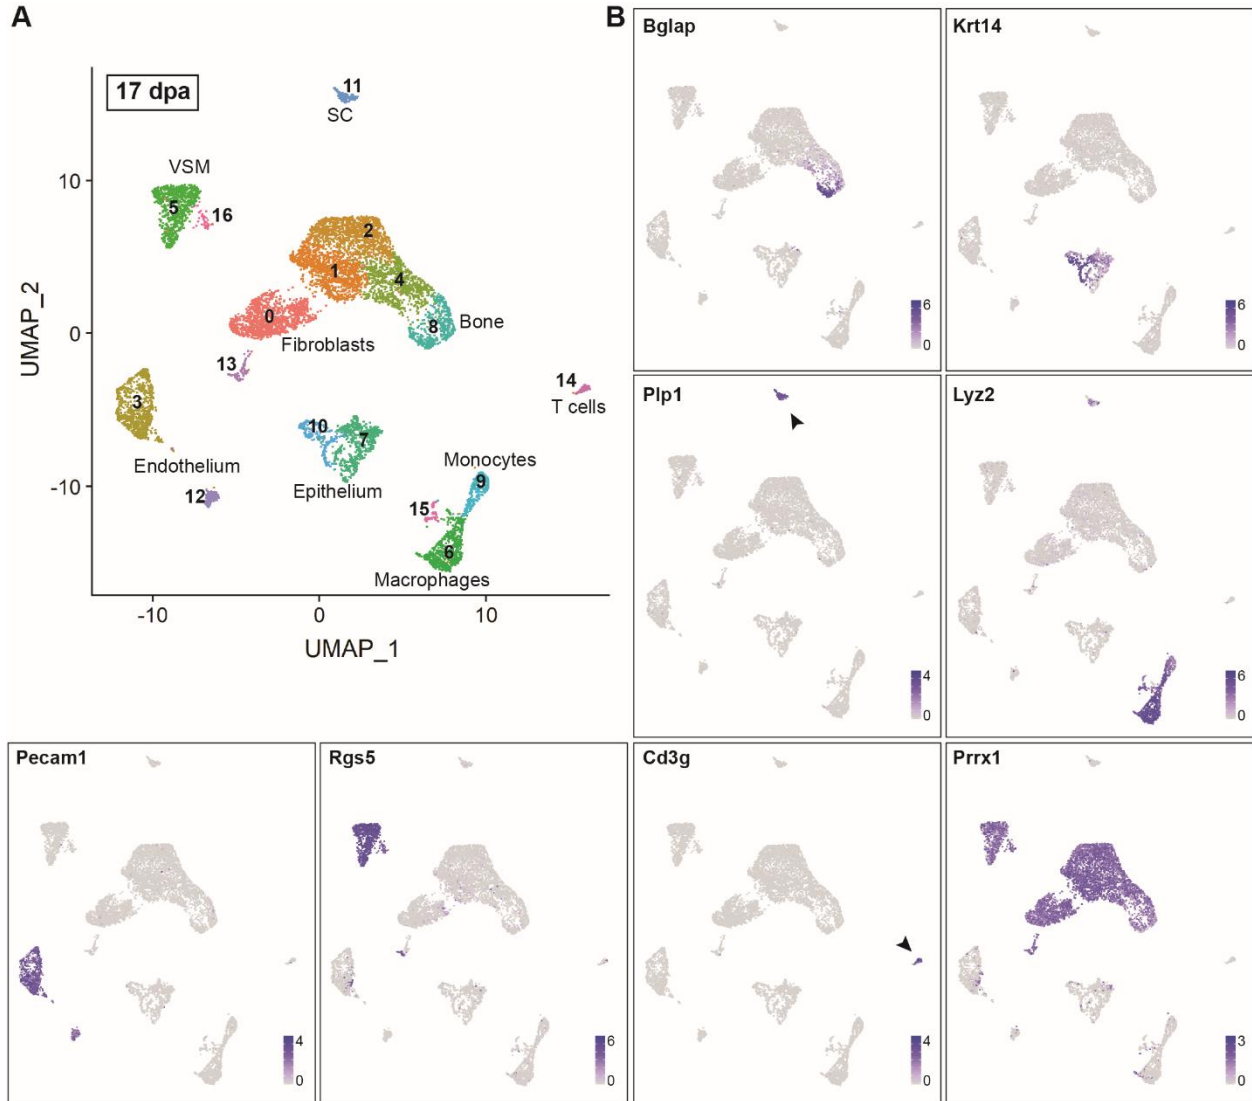**C**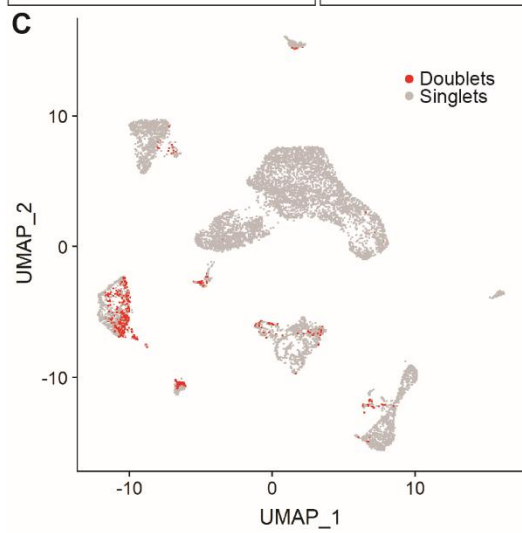

## Figure S4

### Single cell RNAseq of 17dpa blastema (Relates to Figure 1 and Table S1)

(A) Unbiased single cell clustering of 8,778 high quality cells visualized by UMAP. Each dot represents a single cell and cells assigned to the same cluster are similarly colored. Cell type identities are assigned as follows: fibroblasts (clusters 0-2, and 4), endothelial cells (clusters 3 and 12), vascular smooth muscle cells (VSM) (clusters 5 and 16), macrophages (cluster 6), epithelial cells (clusters 7 and 10), bone (cluster 8), monocytes (clusters 9 and 15), Schwann cells (SC) (cluster 11), T cells (cluster 14). (B) Gene expression UMAP overlay with examples of highly expressed, cell type specific markers used to assign cluster cell identities: *Bglap* (bone), *Krt14* (epithelial cells), *Plp1* (SCs), *Lyz2* (monocytes/macrophages), *Pecam1* (endothelial cells), *Rgs5* (vascular smooth muscle cells), *Cd3g* (T cells), *Prrxl* (fibroblasts). Gray depicts low expression and purple depicts high expression as specified on the scale for each gene. Black arrowheads denote the population of cells expressing a particular marker. (C) 606 cells were classified as doublets (red) and excluded from all subsequent analyses.



**A**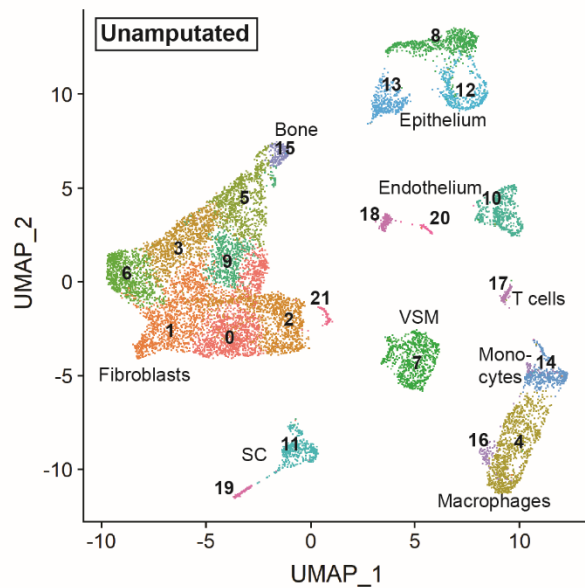**B**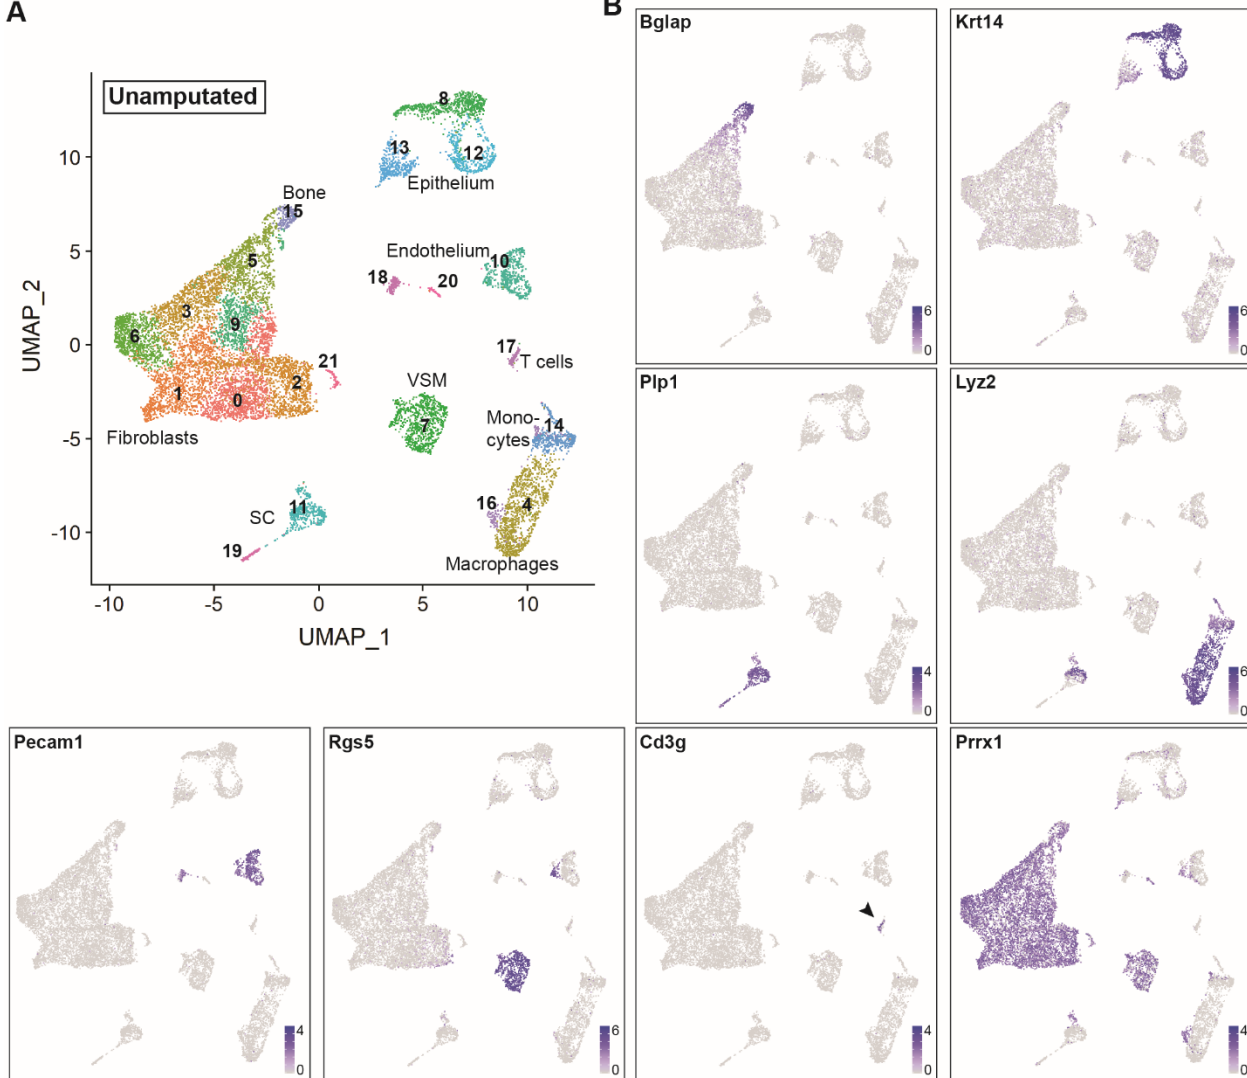**C**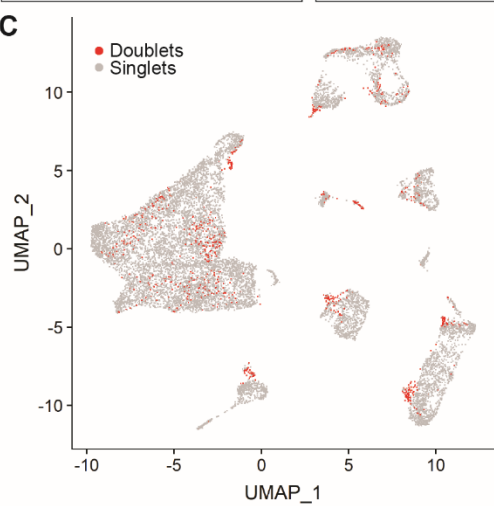

## Figure S5

### Single cell RNAseq of the unamputated digit tip (Relates to Figure 1 and Table S1)

(A) Unbiased single cell clustering of 12,871 high quality cells visualized by UMAP. Each dot represents a single cell and cells assigned to the same cluster are similarly colored. Cell type identities are assigned as follows: fibroblasts (clusters 0-3, 5, 6, 9, and 21), macrophages (clusters 4 and 16), vascular smooth muscle cells (VSM) (cluster 7), epithelial cells (clusters 8, 12, and 13), endothelial cells (cluster 10, 18, and 20), Schwann cells (SC) (clusters 11 and 19), monocytes (cluster 14), bone (cluster 15), T cells (cluster 17). (B) Gene expression UMAP overlay with examples of highly expressed, cell type specific markers used to assign cluster cell identities: *Bglap* (bone), *Krt14* (epithelial cells), *Plp1* (SCs), *Lyz2* (monocytes/macrophages), *Pecam1* (endothelial cells), *Rgs5* (vascular smooth muscle cells), *Cd3g* (T cells), *Prrx1* (fibroblasts). Gray depicts low expression and purple depicts high expression as specified on the scale for each gene. Black arrowheads denote the population of cells expressing a particular marker. (C) 978 cells were classified as doublets (red) and excluded from all subsequent analyses.

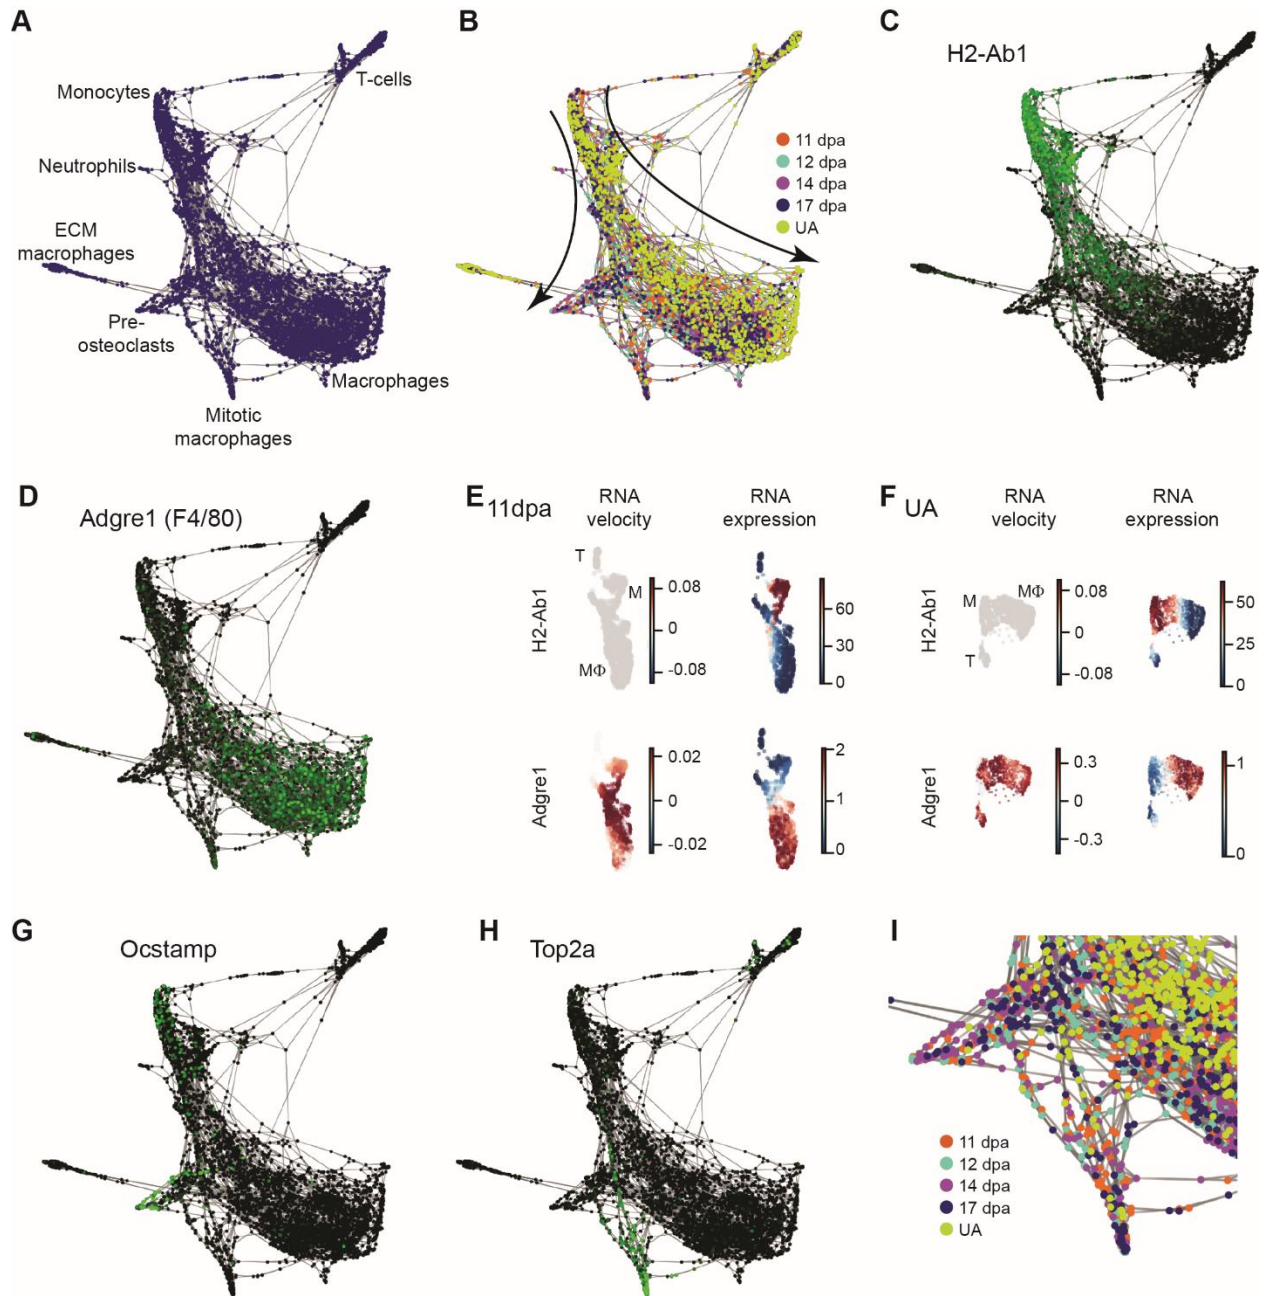

## Figure S6

### Differentiation trajectory analysis of immune-related cells (Relates to Figure 3)

Computationally derived SPRING lineage trajectory analysis of cells from the integrated data set immune-related clusters 7, 11, 12, 17, 19, 21, and 22. (A) Force-directed SPRING plot of cells showing monocytes, macrophages, ECM macrophages (express ECM related genes; population of unknown relevance), mitotic macrophages, pre-osteoclasts, T cells. (B) SPRING plot as in (A) with regenerative stages of each cell colored coded: 11dpa (orange), 12dpa (light blue), 14dpa (purple), 17dpa (dark blue), unamputated (yellow). Known differentiation trajectories from monocytes to macrophages, and monocytes to pre-osteoclasts are depicted with curved arrows. (C and D) Marker gene expression overlay supports computationally defined monocyte to macrophage differentiation. *H2-Ab1* is expressed in monocytes and *Adgre1*(F4/80) is expressed in macrophages. High expression is in green and low expression is black. (E and F) UMAP plots of RNA velocity and expression data for individual monocyte and macrophage genes *H2-Ab1* and *Adgre1* in 11dpa and UA samples; M = monocytes, T = T cells, and MΦ = macrophages. (G and H) Gene expression overlay showing *Ocstamp* pre-osteoclast expression and *Top2a* mitotic macrophage expression. (I) Close-up of pre-osteoclasts and mitotic macrophages in (B); qualitative evaluation shows enrichment for blastema stages.

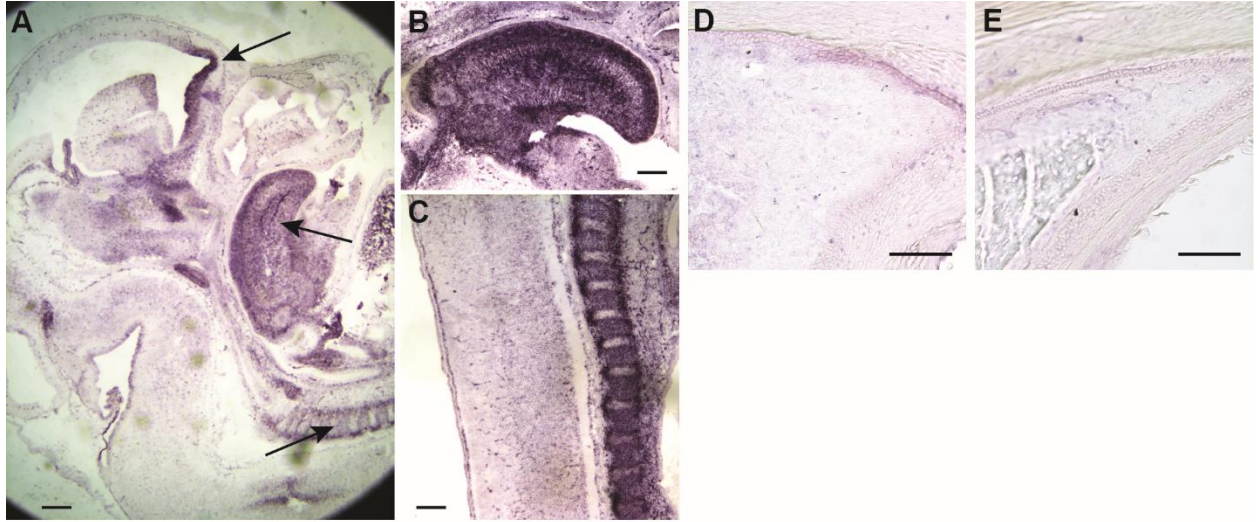

**F** *Acan*  
(No probe/amplifier only)

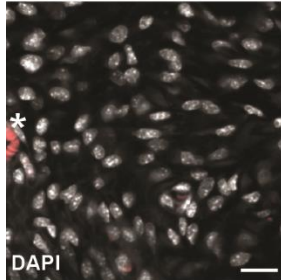

**G** *Aldh1a2*  
(No probe/amplifier only)

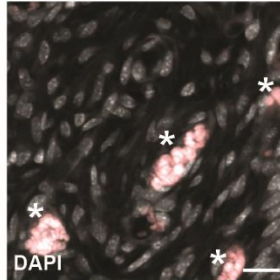

**H** *Mmp13*  
(No probe/amplifier only)

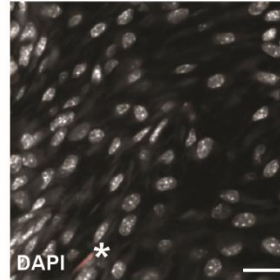

**I** *Scara5*  
(No probe/amplifier only)

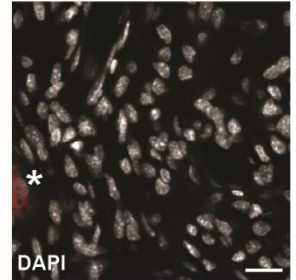

## Figure S7

### RNA in situ control expression (Relates to Figures 2 and 7)

(A-E) DIG labeled section RNA in situ controls. (A-C) *Mest* antisense probe positive control on E12.5 mouse embryo sections. (A) Transverse section through head and neck region with positive expression (purple) in the developing forebrain, tongue, and vertebrae (arrows). (B and C) Magnified view of panel (A) of (B) tongue and (C) vertebrae. (D and E) *Mest* sense probe negative control on adult mouse digit tip sections. No appreciable expression from sense probe is found on (D) 12dpa or (E) unamputated tissues. Scale bars = 400 $\mu$ m for (A), 200 $\mu$ m for (B and C), and 100 $\mu$ m for (D and E). (F-I) Mid-blastema fields of no probe/amplifier only HCR RNA FISH negative controls. (F) Amplifier for *Acan* probe, (G) amplifier for *Aldh1a2* probe, (H) amplifier for *Mmp13* probe, (I) amplifier for *Scara5* probe. Scale bars = 20 $\mu$ m.

| <b>11dpa fibroblast cluster #</b> | <b>GO significant categories</b>                                                                                                                                                                                                                                                                         |
|-----------------------------------|----------------------------------------------------------------------------------------------------------------------------------------------------------------------------------------------------------------------------------------------------------------------------------------------------------|
| <b>0</b>                          | granulocyte chemotaxis, inflammatory response, Wnt signaling pathway, response to cytokine, regulation of signal transduction                                                                                                                                                                            |
| <b>1</b>                          | antimicrobial humoral immune response, response to lipopolysaccharide, response to cytokine                                                                                                                                                                                                              |
| <b>2</b>                          | none significant                                                                                                                                                                                                                                                                                         |
| <b>4</b>                          | skeletal system development, extracellular matrix organization                                                                                                                                                                                                                                           |
| <b>5</b>                          | extracellular matrix organization, cell development, regulation of signal transduction                                                                                                                                                                                                                   |
| <b>6</b>                          | iron ion import, transmembrane receptor protein tyrosine kinase signaling pathway                                                                                                                                                                                                                        |
| <b>8</b>                          | DNA recombination, chromosome segregation, chromosome condensation, regulation of cyclin-dependent protein serine/threonine kinase activity, positive regulation of cell cycle, mitotic nuclear division, chromatin organization, microtubule cytoskeleton organization, nucleotide biosynthetic process |

## **Table S2**

### **GO terms associated with 11dpa fibroblast cluster gene expression (Relates to Figure 2 and S1)**

Significant GO slim biological process categories for 11dpa fibroblast clusters with adjusted p-value  $\leq 0.05$  and average log fold-change  $\geq 0.05$ .

|            | ua vs. 11 | ua vs. 12 | ua vs. 14 | ua vs. 17 | 11 vs. 12 | 11 vs. 14 | 11 vs. 17 | 12 vs. 14 | 12 vs. 17 | 14 vs. 17 |
|------------|-----------|-----------|-----------|-----------|-----------|-----------|-----------|-----------|-----------|-----------|
| cluster_0  | 0.0000    | 0.0031    | 0.0009    | 0.1675    | 0.1033    | 0.0484    | 0.0000    | 0.4417    | 0.0234    | 0.0132    |
| cluster_1  | 0.0004    | 0.0335    | 0.0182    | 0.4171    | 0.2297    | 0.1847    | 0.0009    | 0.4767    | 0.0577    | 0.0335    |
| cluster_2  | 0.3133    | 0.4055    | 0.4055    | 0.4055    | 0.4055    | 0.4055    | 0.4055    | 0.4944    | 0.4944    | 0.4944    |
| cluster_3  | 0.4083    | 0.4100    | 0.4083    | 0.4083    | 0.4083    | 0.4083    | 0.4083    | 0.4083    | 0.4933    | 0.4083    |
| cluster_4  | 0.2039    | 0.2039    | 0.2568    | 0.2039    | 0.4547    | 0.4547    | 0.4547    | 0.4547    | 0.4547    | 0.4547    |
| cluster_5  | 0.0080    | 0.1525    | 0.1630    | 0.1630    | 0.3354    | 0.1630    | 0.1525    | 0.3598    | 0.3354    | 0.4094    |
| cluster_6  | 0.2034    | 0.3882    | 0.3825    | 0.0206    | 0.3882    | 0.3882    | 0.0034    | 0.4327    | 0.0328    | 0.0117    |
| cluster_7  | 0.4374    | 0.4374    | 0.4374    | 0.4477    | 0.4477    | 0.4374    | 0.4374    | 0.4477    | 0.4374    | 0.4374    |
| cluster_8  | 0.0004    | 0.0008    | 0.0000    | 0.4231    | 0.4231    | 0.3606    | 0.0016    | 0.4231    | 0.0020    | 0.0003    |
| cluster_9  | 0.2619    | 0.2619    | 0.1057    | 0.2165    | 0.4217    | 0.2523    | 0.1057    | 0.2931    | 0.1110    | 0.0233    |
| cluster_10 | 0.2558    | 0.1640    | 0.1640    | 0.2134    | 0.3480    | 0.3480    | 0.4327    | 0.4223    | 0.3480    | 0.3634    |
| cluster_11 | 0.4826    | 0.4826    | 0.4826    | 0.4826    | 0.4826    | 0.4905    | 0.4826    | 0.4826    | 0.4826    | 0.4826    |
| cluster_12 | 0.4776    | 0.4776    | 0.4776    | 0.4776    | 0.4776    | 0.4776    | 0.4776    | 0.4776    | 0.4776    | 0.4776    |
| cluster_13 | 0.0002    | 0.0047    | 0.0039    | 0.2585    | 0.4124    | 0.2585    | 0.0016    | 0.3426    | 0.0169    | 0.0169    |
| cluster_14 | 0.0347    | 0.1077    | 0.0095    | 0.1550    | 0.4658    | 0.3193    | 0.2792    | 0.3193    | 0.3193    | 0.1550    |
| cluster_15 | 0.0107    | 0.1713    | 0.0107    | 0.4448    | 0.3003    | 0.4544    | 0.0287    | 0.3003    | 0.2297    | 0.0287    |
| cluster_16 | 0.0001    | 0.0022    | 0.0001    | 0.0264    | 0.4547    | 0.4609    | 0.0768    | 0.4547    | 0.1741    | 0.0927    |
| cluster_17 | 0.4741    | 0.4741    | 0.1840    | 0.4741    | 0.4741    | 0.1840    | 0.4741    | 0.1840    | 0.4741    | 0.1840    |
| cluster_18 | 0.1061    | 0.2972    | 0.1182    | 0.4041    | 0.3917    | 0.4041    | 0.1182    | 0.4041    | 0.3501    | 0.1941    |
| cluster_19 | 0.3950    | 0.3950    | 0.3950    | 0.3950    | 0.3950    | 0.3950    | 0.3950    | 0.3950    | 0.3950    | 0.3950    |
| cluster_20 | 0.0438    | 0.0438    | 0.0438    | 0.0438    | 0.4732    | 0.4732    | 0.4732    | 0.4732    | 0.4732    | 0.4732    |
| cluster_21 | 0.3208    | 0.3208    | 0.3208    | 0.3283    | 0.3854    | 0.4668    | 0.3854    | 0.3854    | 0.3854    | 0.3854    |
| cluster_22 | 0.3524    | 0.3060    | 0.2741    | 0.3524    | 0.3054    | 0.2741    | 0.3081    | 0.3054    | 0.3081    | 0.2741    |

**Table S4**

**P-values for differential population analysis of all stage integrated dataset (Relates to Figure 3)**

All resultant p-values for regenerative stage pairwise differential proportion analyses testing for significant changes in proportion of cells within clusters. Reported values have been corrected for multiple hypothesis testing. Column headers indicate regenerative stages being compared: 11 = 11dpa, 12 = 12dpa, 14 = 14dpa, 17 = 17dpa, and ua = unamputated. Cluster numbers in each row refer to UMAP cluster classification in Figure 3B. All table cells in gray are noted as significant with  $p \leq 0.05$ .



|            | ua vs. 11 | ua vs. 12 | ua vs. 14 | ua vs. 17 | 11 vs. 12 | 11 vs. 14 | 11 vs. 17 | 12 vs. 14 | 12 vs. 17 | 14 vs. 17 |
|------------|-----------|-----------|-----------|-----------|-----------|-----------|-----------|-----------|-----------|-----------|
| cluster_0  | 0.0000    | 0.0022    | 0.0022    | 0.0743    | 0.1598    | 0.0464    | 0.0005    | 0.2858    | 0.0597    | 0.0871    |
| cluster_1  | 0.0716    | 0.4114    | 0.4114    | 0.4516    | 0.2965    | 0.1889    | 0.0716    | 0.4516    | 0.4114    | 0.4114    |
| cluster_2  | 0.0368    | 0.1355    | 0.0837    | 0.4148    | 0.4148    | 0.4148    | 0.0837    | 0.4896    | 0.1763    | 0.1362    |
| cluster_3  | 0.0004    | 0.0597    | 0.0730    | 0.2955    | 0.2656    | 0.0960    | 0.0053    | 0.2955    | 0.0960    | 0.1489    |
| cluster_4  | 0.0005    | 0.0031    | 0.0031    | 0.0281    | 0.4892    | 0.4150    | 0.1646    | 0.4162    | 0.2219    | 0.2686    |
| cluster_5  | 0.4785    | 0.4785    | 0.4785    | 0.4785    | 0.4785    | 0.4785    | 0.4785    | 0.4785    | 0.4785    | 0.4785    |
| cluster_6  | 0.1910    | 0.0331    | 0.1002    | 0.2719    | 0.1584    | 0.2854    | 0.3283    | 0.2598    | 0.1002    | 0.2404    |
| cluster_7  | 0.4539    | 0.4539    | 0.4539    | 0.4539    | 0.4539    | 0.4539    | 0.4539    | 0.4539    | 0.4539    | 0.4539    |
| cluster_8  | 0.3678    | 0.4254    | 0.4254    | 0.4254    | 0.4254    | 0.4254    | 0.4254    | 0.4254    | 0.4599    | 0.4254    |
| cluster_9  | 0.3265    | 0.2042    | 0.2042    | 0.2042    | 0.3265    | 0.3723    | 0.3265    | 0.4309    | 0.4309    | 0.4309    |
| cluster_10 | 0.0027    | 0.0238    | 0.0184    | 0.2907    | 0.4103    | 0.2907    | 0.0182    | 0.3887    | 0.0668    | 0.0668    |
| cluster_11 | 0.4710    | 0.0952    | 0.0294    | 0.0294    | 0.0952    | 0.0294    | 0.0340    | 0.4227    | 0.4710    | 0.4227    |
| cluster_12 | 0.0000    | 0.0000    | 0.0000    | 0.0008    | 0.4960    | 0.4960    | 0.2256    | 0.4960    | 0.2256    | 0.2256    |
| cluster_13 | 0.0966    | 0.0978    | 0.0966    | 0.0966    | 0.4440    | 0.4440    | 0.4440    | 0.4440    | 0.4440    | 0.4440    |

**Table S6**

**P-values for differential population analysis of re-clustered fibroblast and bone populations**

**(Relates to Figures 5 and 6)**

All resultant p-values for regenerative stage pairwise differential proportion analyses testing for significant changes in proportion of cells within clusters. Reported values have been corrected for multiple hypothesis testing. Column headers indicate regenerative stages being compared: 11 = 11dpa, 12 = 12dpa, 14 = 14dpa, 17 = 17dpa, and ua = unamputated. Cluster numbers in each row refer to UMAP cluster classification in Figure 5A. All table cells in gray are noted as significant with  $p \leq 0.05$ .
